# Supplementary material
Source: PubMed Central journal article supplement (PMC3533297)
Supplement: JCI64946sd.pdf [file JCI64946sd.pdf]

## Supplemental Data

### **TGF- $\beta$ -mediated miR-181a expression promotes breast cancer metastasis by targeting Bim.**

**Molly A. Taylor<sup>1</sup>, Khalid Sossey-Alaoui<sup>2</sup>, Cheryl L. Thompson<sup>3</sup>, David Danielpour<sup>4</sup>, and William P. Schiemann<sup>4</sup>**

**Author Affiliation:** <sup>1</sup>Department of Pharmacology, Case Western Reserve University, Cleveland, OH, USA, 44106. <sup>2</sup>Department of Molecular Cardiology, Lerner Research Institute, Cleveland Clinic, Cleveland, OH, USA, 44106. <sup>3</sup>Department of Family Medicine, Case Western Reserve University, Cleveland, OH, USA. <sup>4</sup>Case Comprehensive Cancer Center, Case Western Reserve University, Cleveland OH, USA, 44106

**Corresponding Author:** William P. Schiemann, Case Comprehensive Cancer Center, Case Western Reserve University, Wolstein Research Building, 2103 Cornell Road Cleveland, OH 44106 Phone: 216-368-5763. Fax: 216-368-1166. E-mail: [william.schiemann@case.edu](mailto:william.schiemann@case.edu)

### Supplemental Table 1

miRs upregulated by TGF- $\beta$  in 67NR cells

| <b>Compliant</b>    | <b>Fold Upregulation</b> | <b>P-value</b> |
|---------------------|--------------------------|----------------|
| <b>mmu-miR-181a</b> | <b>1.87</b>              | <b>0.00009</b> |
| <b>mmu-miR-181b</b> | <b>1.79</b>              | <b>0.00028</b> |
| mmu-miR-106a        | 1.06                     | 0.00374        |
| mmu-miR-186*        | 1.25                     | 0.00026        |
| mmu-miR-21          | 1.28                     | 0.00367        |
| mmu-miR-181d        | 1.34                     | 0.00443        |
| mmu-miR-27a*        | 1.11                     | 0.00152        |
| mmu-miR-34a         | 1.07                     | 0.07899        |
| mmu-miR-125b*       | 1.15                     | 0.00196        |
| mmu-miR-183*        | 1.05                     | 0.01789        |
| mmu-miR-101b        | 1.07                     | 0.02083        |
| mmu-miR-379         | 1.05                     | 0.04343        |
| mmu-miR-292-3p      | 1.13                     | 0.00422        |
| mmu-miR-345-3p      | 1.13                     | 0.00936        |
| mmu-miR-425*        | 1.07                     | 0.01164        |
| mmu-miR-710         | 1.06                     | 0.01074        |
| mmu-miR-879         | 1.11                     | 0.01951        |
| mmu-miR-350         | 1.18                     | 0.07207        |
| mmu-miR-138         | 1.16                     | 0.01365        |
| mmu-miR-299         | 1.20                     | 0.01704        |
| mmu-miR-708*        | 1.08                     | 0.01513        |
| mmu-miR-679         | 1.09                     | 0.04203        |
| mmu-miR-615-3p      | 1.22                     | 0.02645        |
| mmu-miR-470*        | 1.09                     | 0.05316        |
| mmu-miR-199b*       | 1.18                     | 0.0178         |
| mmu-miR-412         | 1.15                     | 0.02719        |
| mmu-miR-143         | 1.17                     | 0.02144        |
| <b>Rigid</b>        | <b>Fold Upregulation</b> | <b>P-value</b> |
| <b>mmu-miR-181b</b> | <b>1.79</b>              | <b>0.0003</b>  |
| <b>mmu-miR-181d</b> | <b>1.36</b>              | <b>0.00082</b> |
| <b>mmu-miR-181a</b> | <b>1.68</b>              | <b>0.00201</b> |

## Supplemental Table 2

miRs upregulated by TGF- $\beta$  in 4T07 cells

| <b>Compliant</b>    | <b>Fold Upregulation</b> | <b>P-value</b> |
|---------------------|--------------------------|----------------|
| <b>mmu-miR-181a</b> | <b>2.04</b>              | <b>0.00012</b> |
| <b>mmu-miR-181b</b> | <b>2.10</b>              | <b>0.00028</b> |
| mmu-miR-494         | 1.24                     | 0.00027        |
| mmu-miR-149         | 1.27                     | 0.0015         |
| mmu-miR-500         | 1.12                     | 0.00363        |
| <b>Rigid</b>        | <b>Fold Upregulation</b> | <b>P-value</b> |
| <b>mmu-miR-181b</b> | <b>1.94</b>              | <b>0.00007</b> |
| <b>mmu-miR-181a</b> | <b>1.80</b>              | <b>0.00043</b> |
| <b>mmu-miR-181d</b> | <b>1.35</b>              | <b>0.00292</b> |
| mmu-miR-22          | 1.51                     | 0.00162        |
| mmu-miR-292-5p      | 1.10                     | 0.01134        |
| mmu-miR-181a-2*     | 1.12                     | 0.00711        |
| mmu-miR-882         | 1.13                     | 0.00547        |
| mmu-miR-362-3p      | 1.20                     | 0.00615        |
| mmu-miR-34a         | 1.34                     | 0.00658        |
| mmu-miR-140*        | 1.58                     | 0.00902        |
| mmu-miR-99b         | 1.12                     | 0.03687        |

### Supplemental Table 3

miRs upregulated by TGF- $\beta$  in 4T1 cells

| <b>Compliant</b>    | <b>Fold Upregulation</b> | <b>P-value</b> |
|---------------------|--------------------------|----------------|
| mmu-miR-22          | 2.28                     | 0.00022        |
| mmu-miR-146a        | 2.82                     | 0.00028        |
| mmu-miR-146b        | 2.39                     | 0.00049        |
| mmu-miR-362-5p      | 1.09                     | 0.00114        |
| mmu-miR-149         | 1.58                     | 0.00132        |
| <b>mmu-miR-181b</b> | <b>1.94</b>              | <b>0.00371</b> |
| <b>mmu-miR-181a</b> | <b>1.91</b>              | <b>0.00684</b> |
| mmu-let-7i          | 1.99                     | 0.00214        |
| mmu-miR-155         | 1.26                     | 0.02205        |
| mmu-miR-34a         | 1.72                     | 0.00908        |
| mmu-miR-183         | 1.20                     | 0.01577        |
| mmu-miR-181d        | 1.27                     | 0.06512        |
| <b>Rigid</b>        | <b>Fold Upregulation</b> | <b>P-value</b> |
| mmu-miR-290-5p      | 1.49                     | 0.00015        |
| <b>mmu-miR-181b</b> | <b>1.95</b>              | <b>0.00028</b> |
| mmu-miR-146b        | 1.79                     | 0.00038        |
| mmu-miR-146a        | 2.18                     | 0.00042        |
| mmu-miR-132         | 1.67                     | 0.0005         |
| <b>mmu-miR-181a</b> | <b>1.82</b>              | <b>0.0015</b>  |
| mmu-miR-22          | 2.39                     | 0.00256        |
| mmu-miR-34a         | 1.59                     | 0.00535        |
| mmu-let-7i          | 1.56                     | 0.00637        |
| <b>mmu-miR-181d</b> | <b>1.33</b>              | <b>0.02755</b> |

**Supplementary Table 4**  
Real-time PCR primer pairs

| <b>Target</b> | <b>Application</b> | <b>Sequence (5' to 3')</b>   |
|---------------|--------------------|------------------------------|
| miR-181a      | PCR-Sense          | 5'-AACATTCAACGCTGTCGGTGAGT   |
| miR-181b      | PCR-Sense          | 5'-AACATTCATTGCTGTCGGTGGGT   |
| miR-181c      | PCR-Sense          | 5'-AACATTCAACCTGTCGGTGAGT    |
| miR-181d      | PCR-Sense          | 5' AACATTCAACCTGTCGGTGAGT    |
| U6            | PCR-Sense          | 5'-GTGCTCGCTTCGGCAGCACAT     |
| Bim           | PCR-Sense          | 5'-TCTGAGTGTGACAGAGAAGGTGGAC |
| Bim           | PCR-Antisense      | 5'-CAGCTCGGTGTGCAATCCGTATC   |
| GAPDH         | PCR-Sense          | 5'-CAACTTTGGCATTGTGGAAGGGCTC |
| GAPDH         | PCR-Antisense      | 5'-GCAGGGATGATGTTCTGGGCAGC   |

Shown are the sense and antisense primers used to amplify the indicated target gene.

**Supplemental Table 5**  
Immunoblotting antibodies

| <b>Antibody</b> | <b>Dilution</b> | <b>Supplier (catalog #)</b> |
|-----------------|-----------------|-----------------------------|
| Phospho-Smad 2  | 1:1000          | Cell Signaling (#3101)      |
| Phospho-Smad 3  | 1:500           | Cell Signaling (#9520)      |
| Total Smad 2/3  | 1:1000          | Cell Signaling (#3102)      |
| Phospho-Src     | 1:500           | Cell Signaling (#2113)      |
| Phospho-Erk1/2  | 1:1000          | Cell Signaling (#9101)      |
| Phospho-Akt     | 1:500           | Cell Signaling (#4060)      |
| Total Src       | 1:1000          | Cell Signaling (#2108)      |
| Total Erk1/2    | 1:1000          | Cell Signaling (#4695)      |
| Total Akt       | 1:500           | Cell Signaling (#9272)      |
| E-Cadherin      | 1:5000          | BD Biosciences (#610182)    |
| Caspase-3       | 1:1000          | Cell Signaling (#9662)      |
| $\beta$ -Actin  | 1:1000          | Santa Cruz (#sc-1616)       |

Shown are the antibodies and dilutions used to visualize the indicated proteins. Also provided are the vendors where these reagents were obtained.

**Supplementary Table 6**

Pharmacological inhibitors

| <b>Name</b>  | <b>Target</b> | <b>Concentration</b> | <b>Supplier</b> |
|--------------|---------------|----------------------|-----------------|
| TβR-I Inh II | TβR-I         | 3.5 μM               | Calbiochem      |
| U0126        | MEK1/2        | 10 μM                | Promega         |
| Akt Inh VIII | Akt           | 1 μM                 | Calbiochem      |

Shown are the pharmacological antagonists and final concentrations used inhibit the indicated protein targets. Also provided are the vendors where these reagents were obtained.

**Supplemental Figure 1: Taylor *et al***

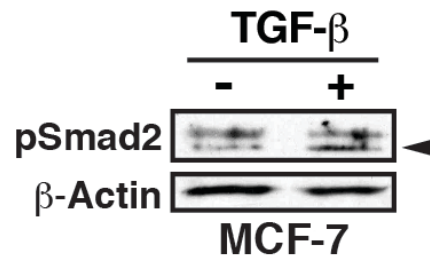

**Supplemental Figure 1**

MCF-7 cells were stimulated with TGF-β1 (5 ng/ml) for 30 min. Afterward, the phosphorylation of Smad2 (arrowhead) was measured by immunoblotting, and differences in protein loading were monitored by reprobng stripped membranes with anti-β-actin antibodies. Images are representative of 2 similar experiments.



Supplementary Figure 2: Taylor *et al*

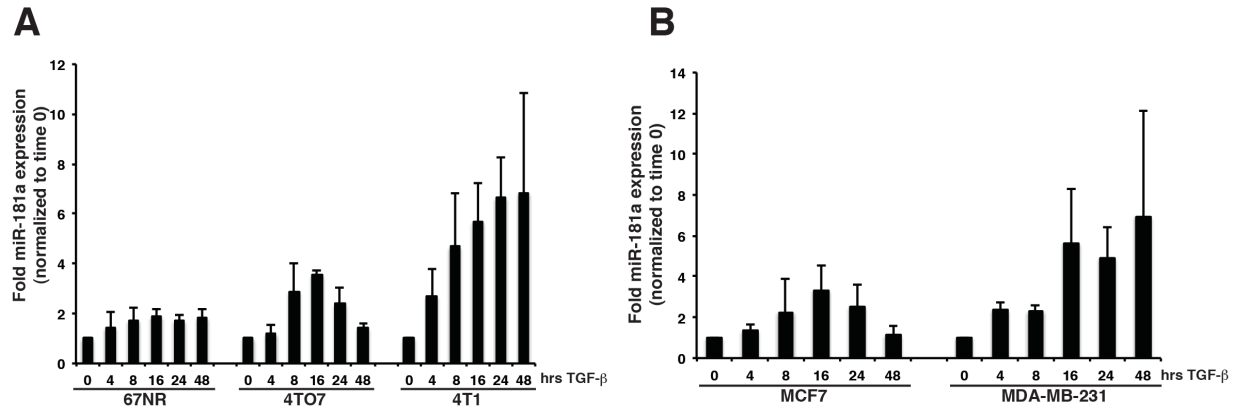

Supplemental Figure 2

Time-course of miR-181a expression induced by TGF- $\beta$  in nonmetastatic and metastatic human and murine breast cancer cells. Murine 67NR, 4T07, and 4T1 cells (**A**) or human MCF-7 or MDA-MB-231 cells (**B**) were stimulated with TGF- $\beta$ 1 (5 ng/ml) for varying times over a span of 48 h as indicated, at which point the expression of miR181a was determined by semi-quantitative real-time PCR.

Supplementary Figure 3: Taylor *et al*

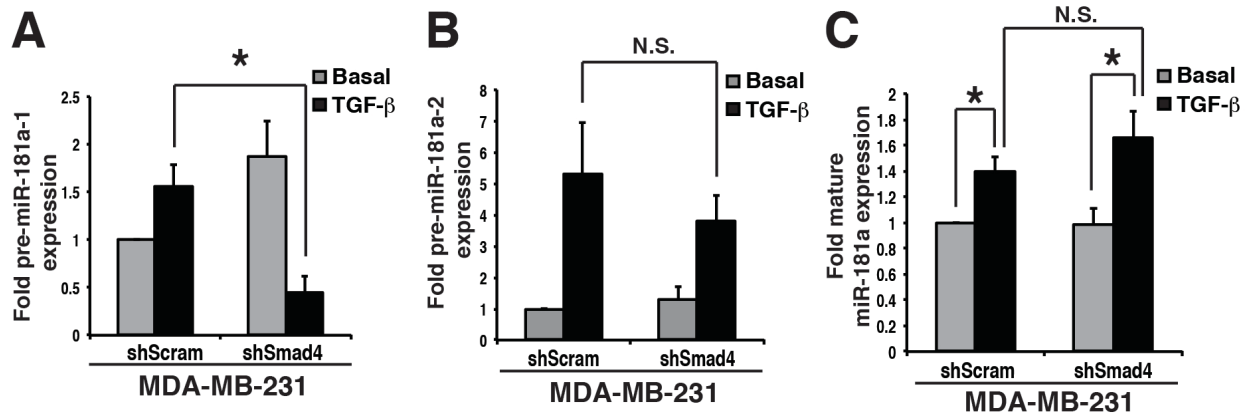

Supplemental Figure 3

Regulation of pre-miR-181a expression and processing by canonical Smad4 signaling. Control (shScram) and Smad4-deficient (shSmad4) MDA-MB-231 cells were stimulated with TGF- $\beta$ 1 (5 ng/ml) for 48 h, at which point the expression of pre-miR-181a-1, pre-miR-181a-2, and miR-181a was determined by semi-quantitative real-time PCR. Individual signals were normalized to those of U6. Data are the mean ( $\pm$ SE; n=3) fold expression of pre-miR-181a-1 (A), pre-miR-181a-2 (B), or miR-181a (C) relative to basal expression levels. (\* $P < 0.05$ ; Student's *t*-Test).

Supplemental Figure 4: Taylor *et al*

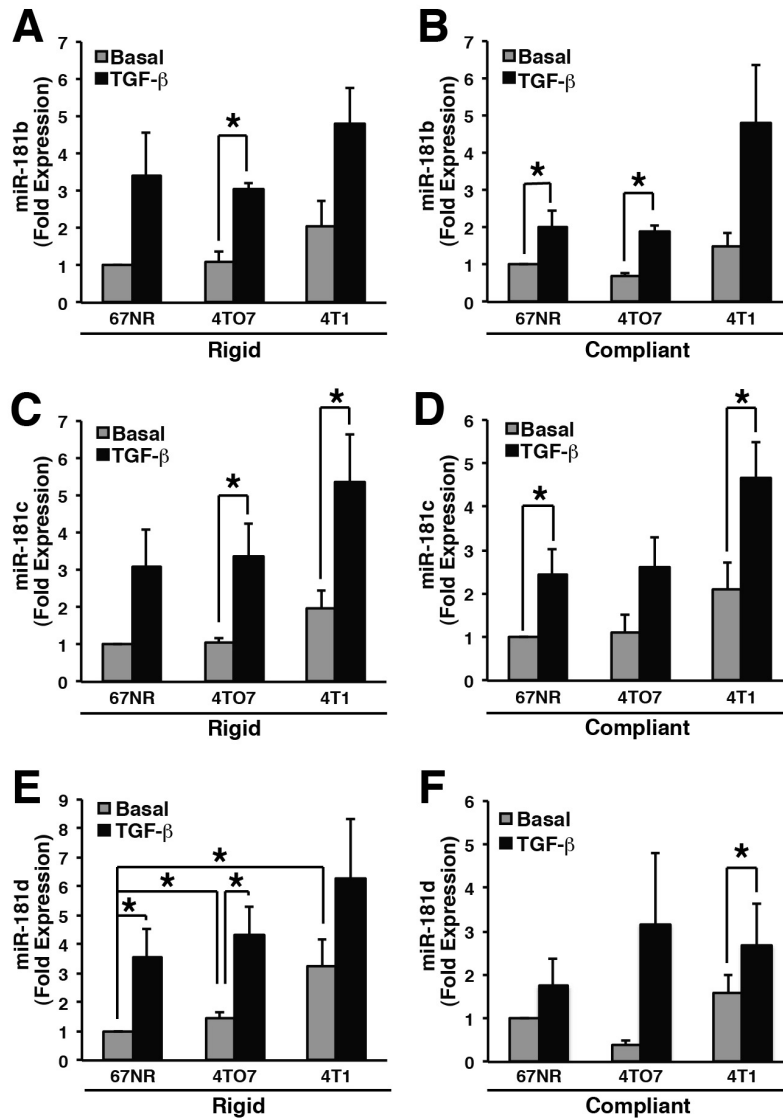

Supplemental Figure 4

TGF-β stimulates the expression of miR-181 family members in 3D-organotypic breast cancer cultures. TGF-β1 (5 ng/ml) treatment of 67NR, 4T07, and 4T1 cells for 6 days in rigid (A, C, E) or compliant (B, D, F) 3D-organotypic cultures universally induced the expression of miR-181b (A&B), miR-181c (C&D), and miR-181d (E&F) as determined by semi-quantitative real-time PCR. Individual miR signals were normalized to those of U6. Data are the mean (±SE; n=3) fold expression of miR-181 family members relative to those detected in basal 67NR cells (\*P<0.05; Student's *t*-Test).

Supplementary Figure 5: Taylor *et al*

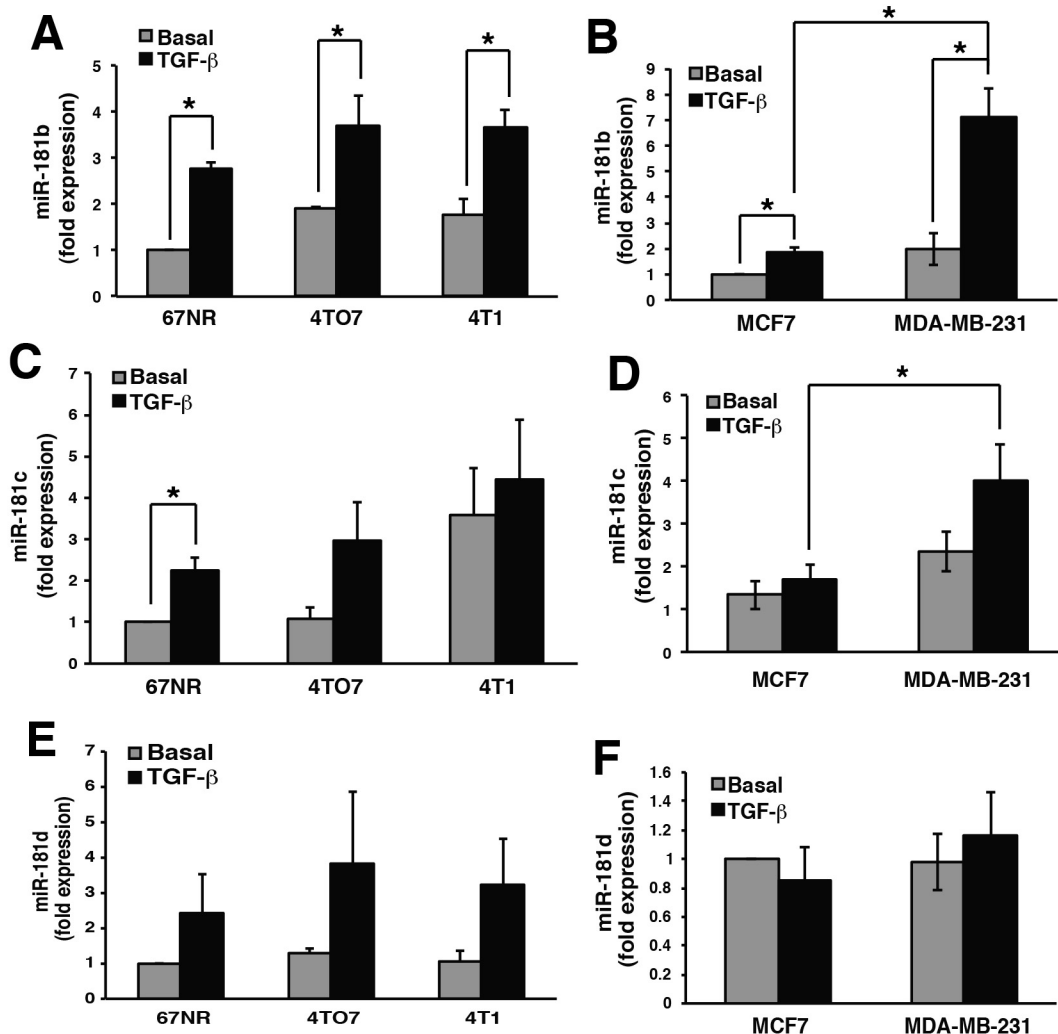

Supplemental Figure 5

TGF- $\beta$  stimulates the expression of miR-181 family members in murine and human breast cancer cells. Murine 67NR, 4T07, and 4T1 cells (**A**, **C**, **E**) or human MCF-7 or MDA-MB-231 (**B**, **D**, **F**) were stimulated with TGF- $\beta$ 1 (5 ng/ml) 48 h, at which point the expression of miR-181b (**A&B**), miR-181c (**C&D**), and miR-181d (**E&F**) was determined by semi-quantitative real-time PCR. Individual miR-181 signals were normalized to those of U6. Data are the mean ( $\pm$ SE; n=3) fold expression of miR-181 family members relative to those detected in basal 67NR (**A**, **C**, **E**) or MCF-7 (**B**, **D**, **F**) cells (\* $P$ <0.05; Student's *t*-Test).

Supplementary Figure 6: Taylor *et al*

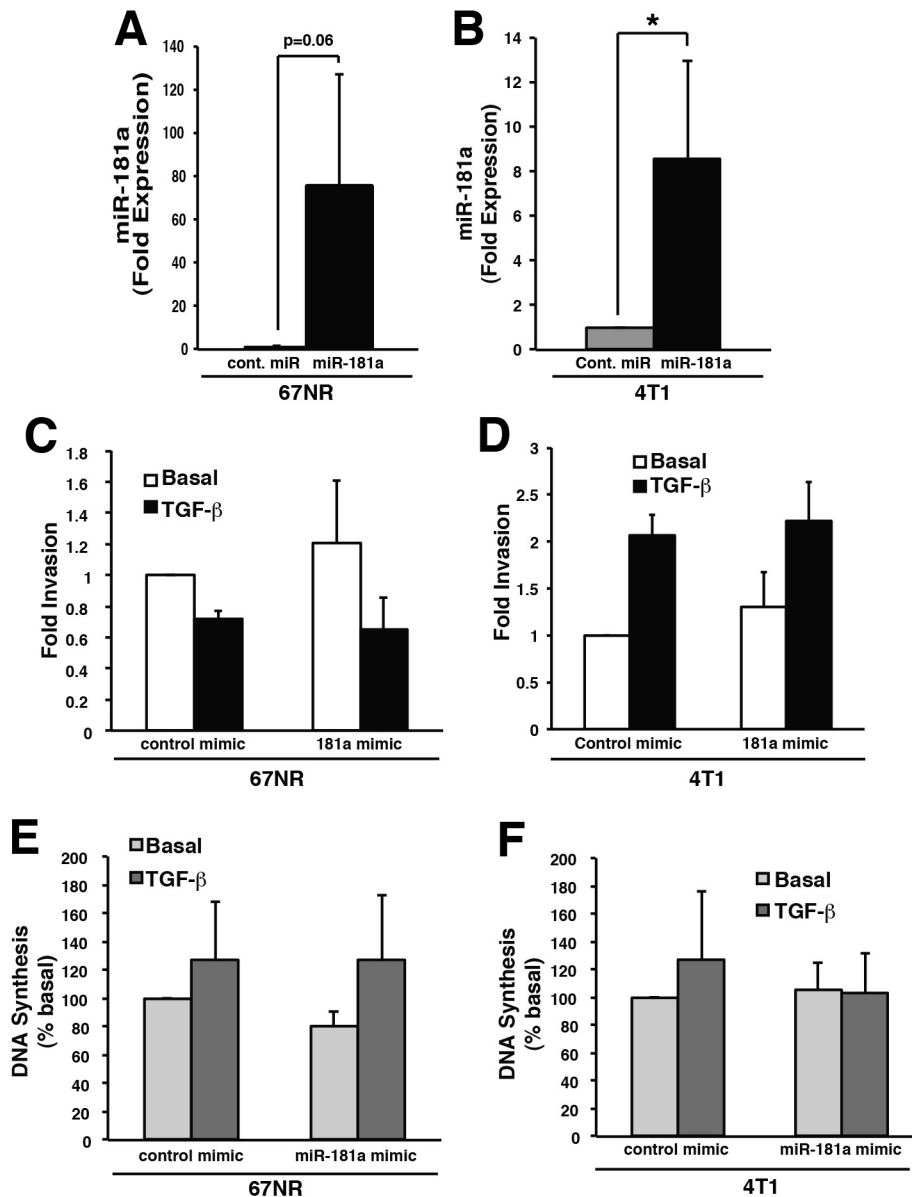

Supplementary Figure 6

Overexpression of miR-181a mimics fail to enhance breast cancer cell invasion and proliferation. (A&B) Transient transfection of miR-181a mimics elevated miR-181a expression in 67NR (A) and 4T1 (B) cells as measured by semi-quantitative real-time PCR. Individual miR-181a signals were normalized against those measured for U6. (C-F) The aforementioned 67NR and 4T1 variants were incubated in the absence (*i.e.*, basal) or presence of TGF-β1 (5 ng/ml) to monitor changes in cell invasion (C&D) or DNA synthesis (E&F). All data are the mean (±SE; n=3) relative to corresponding basal activity (\**P*<0.05; Student's *t*-Test).

Supplementary Figure 7: Taylor *et al*

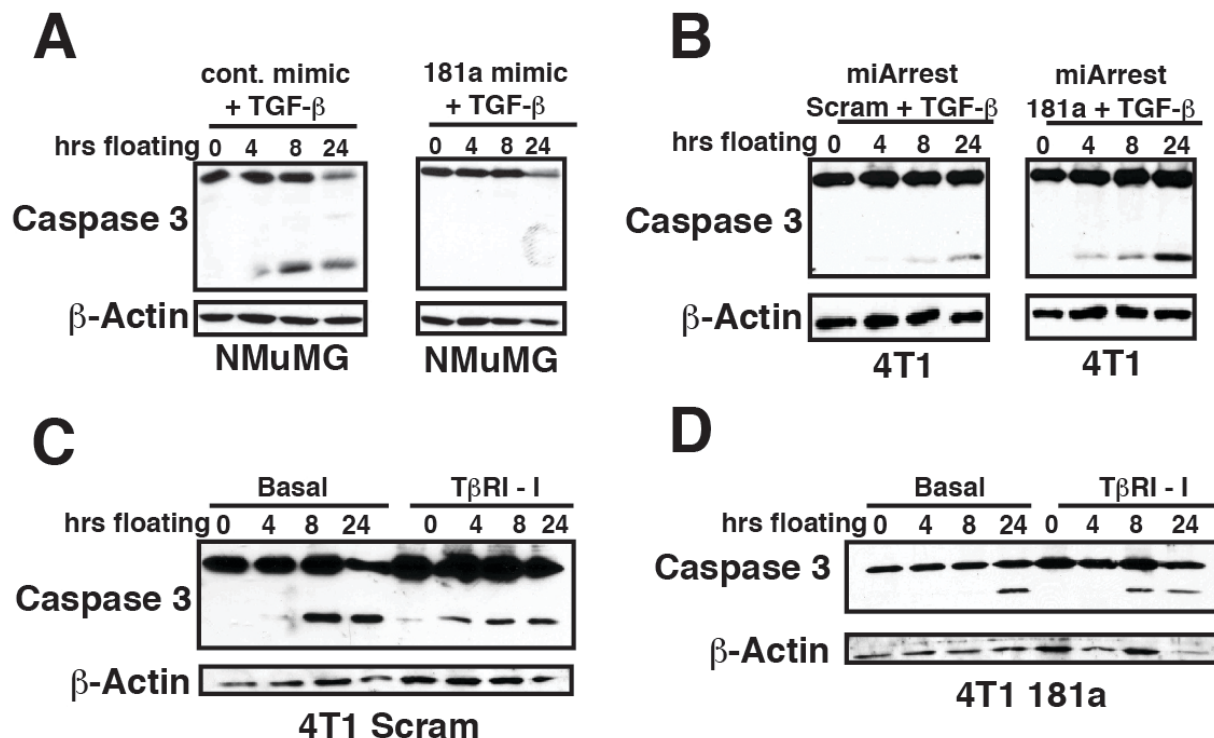

Supplementary Figure 7

Abrogation of TGF- $\beta$  signaling sensitizes normal and malignant MECs to undergo anoikis. **(A&B)** NMuMG **(A)** or 4T1 **(B)** cell derivatives were suspended over poly-HEMA-coated culture dishes and treated with TGF- $\beta$ 1 (5 ng/ml) for 0-24 h as indicated. The extent of anoikis was monitored by immunoblotting for cleavage of caspase-3. **(C&D)** 4T1 derivatives indicated were pre-treated for 48h with the T $\beta$ R-I inhibitor (100 ng/ml) as indicated prior to their being suspended for 24 h over poly-HEMA-coated culture dishes to induce anoikis. Afterward, caspase-3 cleavage was monitored by immunoblotting detergent-solubilized whole-cell extracts with anti-caspase-3 antibodies. Differences in protein loading were assessed with anti- $\beta$ -actin antibodies. Shown are representative images from 3 **(A&B)** or 2 **(C&D)** independent experiments.

Supplementary Figure 8: Taylor *et al*

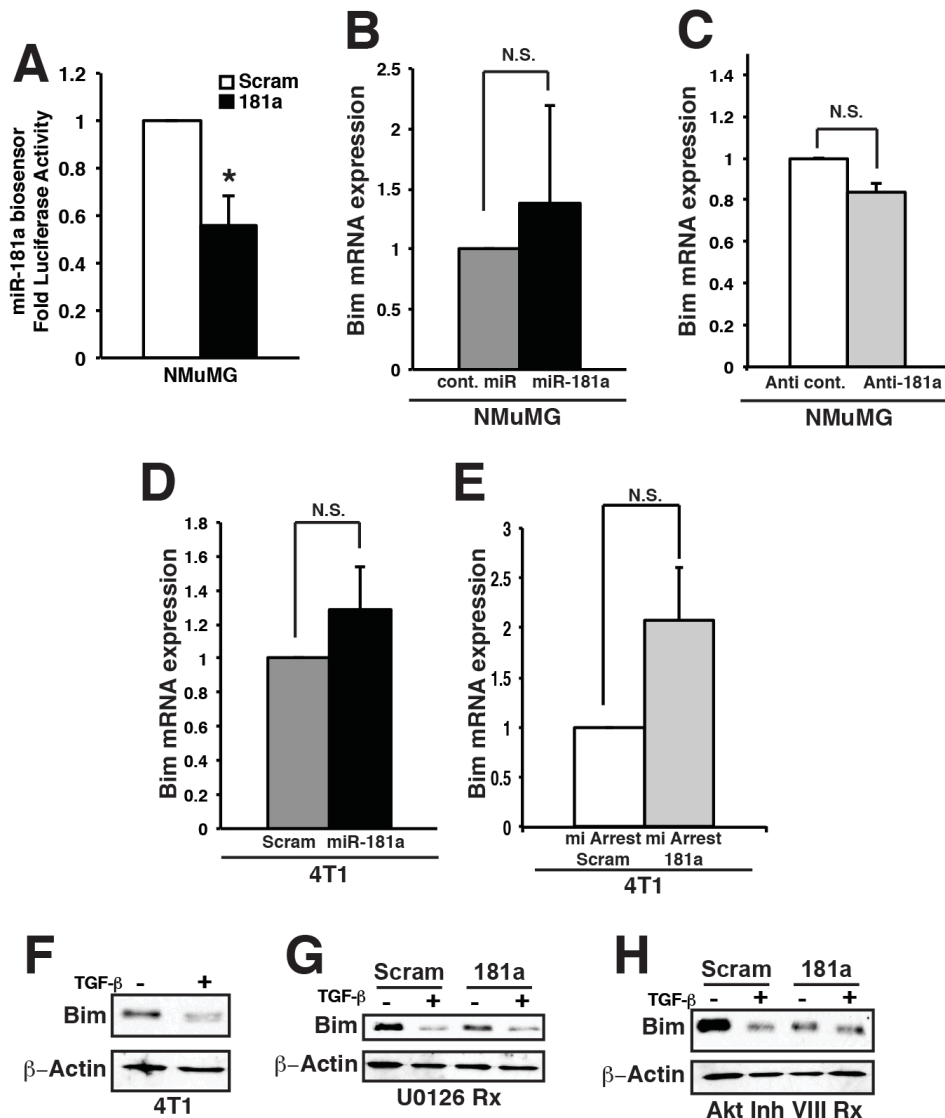

Supplementary Figure 8

miR-181a suppresses Bim expression by repressing the translation of its mRNA. (A) Stable overexpression of miR-181a in NMuMG cells decreased miR-181a biosensor activity indicative of elevated miR-181a activity. (B&C) Neither stimulation of miR-181a expression (B), nor inhibition of its activity (C) in NMuMG cells affected Bim mRNA expression levels as measured by semi-quantitative real-time PCR. Bim transcript levels were normalized to those for GAPDH. (D&E) Neither stimulation of miR-181a expression (D), nor inhibition of its activity (E) in 4T1 cells affected Bim mRNA expression levels as measured by semi-quantitative real-time PCR as above. Data in Panels A-E the mean ( $\pm$ SE;  $n=3$ ; \* $P<0.05$ ; Student's *t*-Test). (F-H) Immunoblotting 4T1 cell extracts demonstrated that TGF- $\beta$  decreased Bim protein levels (F), while neither MEK inhibition (U0126, 10  $\mu$ M; G) or Akt inhibition (Akt Inh VIII, 1  $\mu$ M; H) abrogated the ability of TGF- $\beta$  or miR-181a to decrease Bim protein levels. Differences in protein loading were assessed by  $\beta$ -actin immunoblotting. Shown are representative images from 2 independent experiments.

Supplementary Figure 9: Taylor *et al*

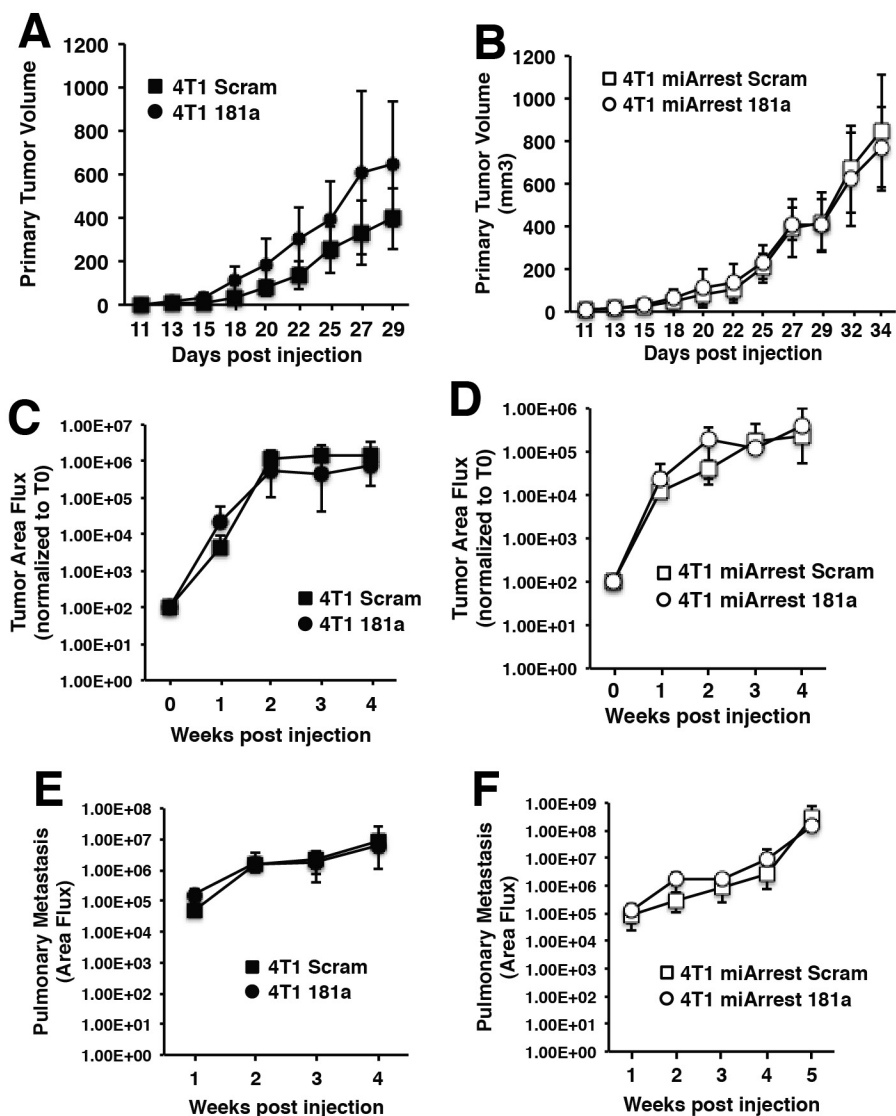

Supplementary Figure 9

miR-181a expression fails to affect primary tumor growth and metastatic dissemination. (A&B) 4T1 cells engineered to overexpress miR-181a (A) or possess diminished miR-181a activity (B) were engrafted onto the mammary fat pads of 6-week-old Balb/c mice. Data are the mean ( $\pm$  SEM; n=5) tumor volumes quantified at the indicated times post engraftment. (C&D) Data are the mean ( $\pm$  SEM; n=5) bioluminescent tumor area flux units detected in the aforementioned tumor-bearing mice. (E&F) Data are the mean ( $\pm$ SE) bioluminescent pulmonary metastasis area flux at the indicated time points.
